# Supplementary material for: Within-host evolution of bovine Staphylococcus aureus selects for a SigB-deficient pathotype characterized by reduced virulence but enhanced proteolytic activity and biofilm formation
Source: PubMed Central journal article supplement (PMC6748969; doi:10.1038/s41598-019-49981-6), 2019-09-17
Supplement: 41598_2019_49981_MOESM1_ESM.pdf [file 41598_2019_49981_MOESM1_ESM.pdf]

# Supplementary Information

## **Within-host evolution of bovine *Staphylococcus aureus* selects for a SigB-deficient pathotype characterized by reduced virulence but enhanced proteolytic activity and biofilm formation**

Helene Marbach<sup>1</sup>, Katharina Mayer<sup>1</sup>, Claus Vogl<sup>2</sup>, Jean Y.H. Lee<sup>3</sup>, Ian R. Monk<sup>3</sup>, Daniel O. Sordelli<sup>4</sup>, Fernanda R. Buzzola<sup>4</sup>, Monika Ehling-Schulz<sup>1</sup>, Tom Grunert<sup>1,\*</sup>

<sup>1</sup> Functional Microbiology, Institute of Microbiology, Department of Pathobiology, University of Veterinary Medicine, Vienna, Austria.

<sup>2</sup> Molecular Genetics, Institute of Animal Breeding and Genetics, Department of Biomedical Sciences, University of Veterinary Medicine, Vienna, Austria.

<sup>3</sup> Department of Microbiology and Immunology, Peter Doherty Institute for Infection and Immunity, University of Melbourne, Melbourne, Australia.

<sup>4</sup> Instituto de Investigaciones en Microbiología y Parasitología Médica (IMPaM), Universidad de Buenos Aires and CONICET, Buenos Aires, Argentina.

**Figure S1. (A) Staphyloxanthin production (B) Tube coagulase (C) Slide agglutination test.**

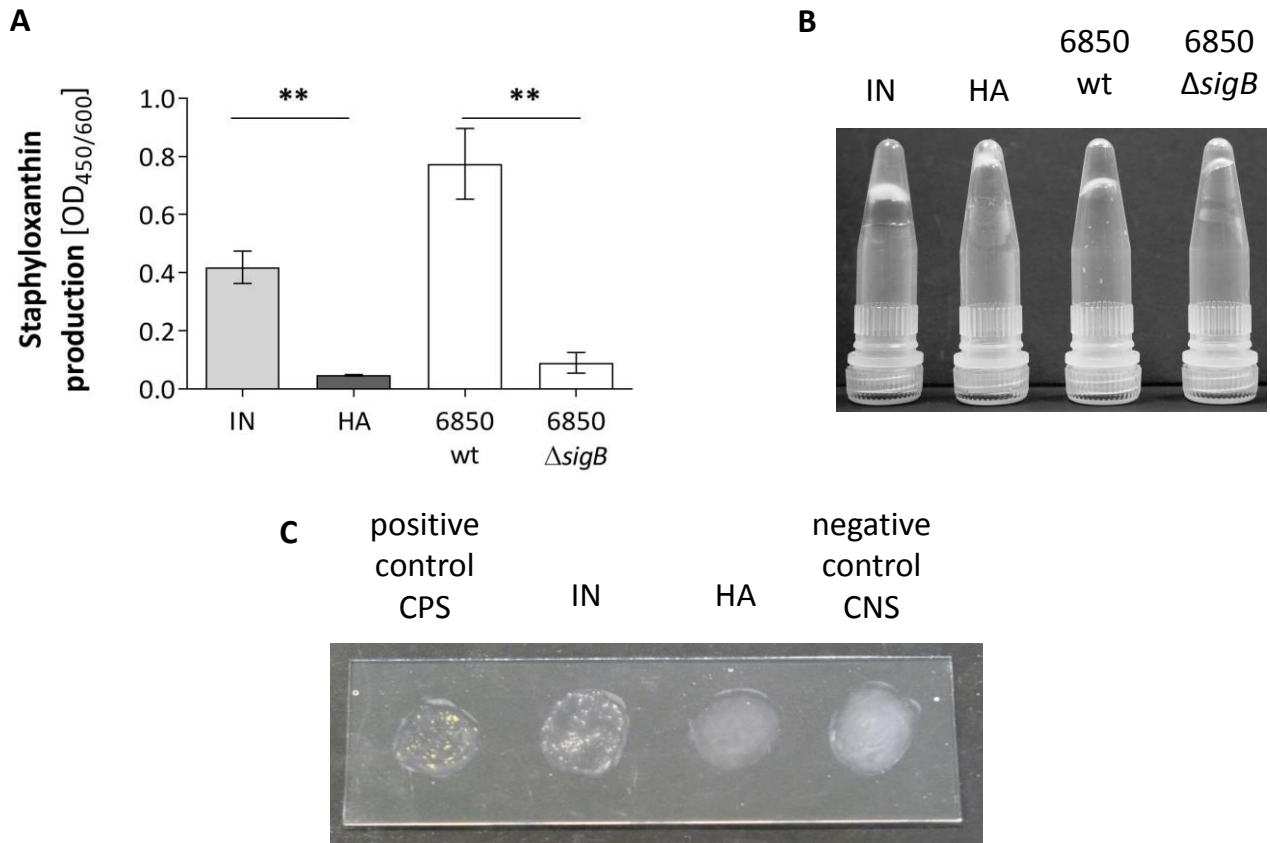

Difference in colony pigmentation intensity is shown as the mean  $\pm$  SEM of three independent experiments with samples measured in duplicate, and statistical difference between the isolates calculated, using the unpaired Student's *t* test. (\*\*,  $P < 0.01$ ); CPS-coagulase positive staphylococci, CNS-coagulase negative staphylococci; IN, initial isolate; HA, host-adapted isolate.

**Figure S2.** *asp23* RT-qPCR

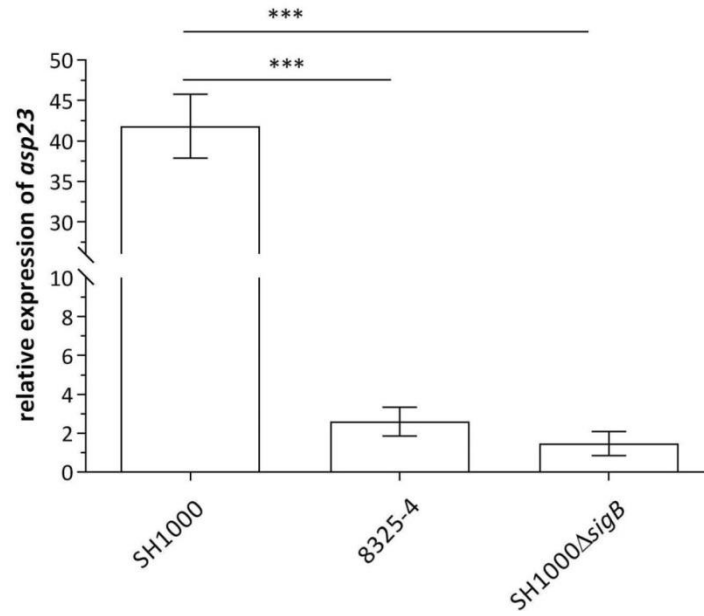

*Asp23* expression of strains grown in TSB to an OD 600 nm of 2.5 was evaluated by RT-qPCR. The data shown are the means of three independently grown strains and their technical duplicates. Statistical difference between the expression of two isolates was determined with unpaired Students *t* test on log<sub>10</sub> transformed data. (\*\*\*,  $P < 0.001$ ).

**Figure S3.** Proteolytic activity: Milk proteolysis on **(A)** 1% Skim milk agar and **(B)** 1% Skim milk (IN, initial isolate; HA, host-adapted isolate).

**A**

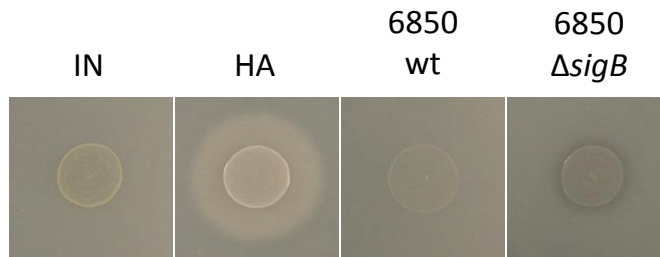

**B**

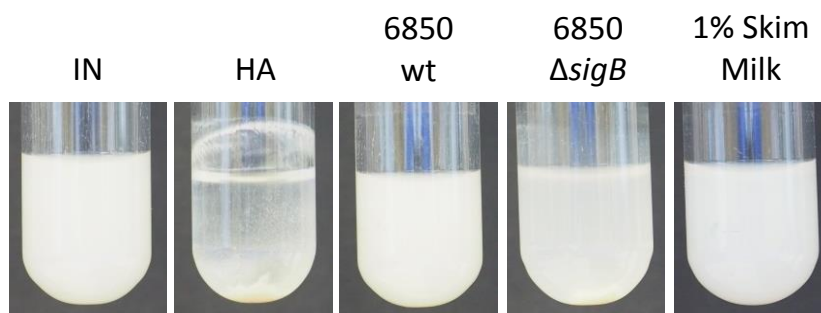

**Figure S4.** MALDI-TOF-MS/MS-based protein identification.

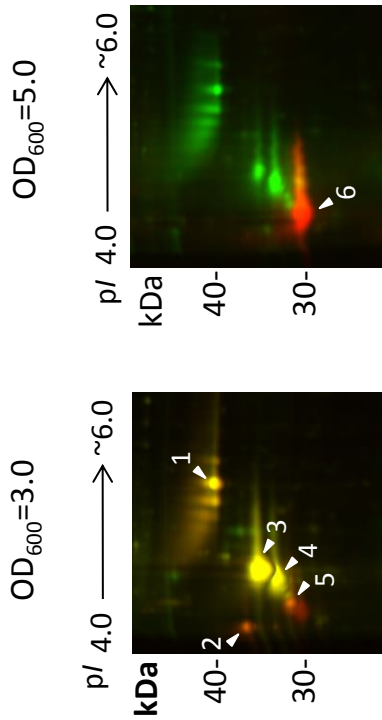

| Spot No. | Gene name | Uni-Prot Accession No. | Search results of Uni-Prot against <i>S. aureus</i> strain COL and alternative name                                                                                                           | MW (kDa) theor. | pI theor. | Probability based Mascot score | Sequ. Cov. % | Matched peptides MS/MS | Range                                            | m/z measured                                     | Peptide score                  | Peptide sequence #                                                                                                     |
|----------|-----------|------------------------|-----------------------------------------------------------------------------------------------------------------------------------------------------------------------------------------------|-----------------|-----------|--------------------------------|--------------|------------------------|--------------------------------------------------|--------------------------------------------------|--------------------------------|------------------------------------------------------------------------------------------------------------------------|
| 1        | SspB      | Q5HH36                 | <b>Staphopain B</b> OS=Staphylococcus aureus (strain COL) OX=93062 GN=sspB PE=3 SV=1; <b>alternative name: cysteine protease</b>                                                              | 44.5            | 5.6       | 503.8                          | 23.9         | 6                      | 56 - 69<br>93 - 107<br>153 - 174<br>164 - 174    | 1566.7682<br>1837.7629<br>2561.1206<br>1346.5929 | 71.4<br>82.4<br>106.9<br>71.7  | K.VKDLAQQQFAGYAK.A<br>K.FNGEEDNSYYYPVIK.D<br>K.NSNITVLTDEKGFYFEEDGKVR.L<br>K.GFYFEEDGKVR.L                             |
| 2        | Aur       | A0A0H2WZZ4             | <b>Zinc metalloproteinase aureolysin</b> OS=Staphylococcus aureus (strain COL) OX=93062 GN=aur PE=4 SV=1; <b>alternative name: Aureolysin</b>                                                 | 56.3            | 5         | 275.1                          | 16.5         | 3                      | 245 - 273<br>296 - 320<br>339 - 368              | 3318.7454<br>2765.3381<br>3234.6721              | 128.9<br>104.3<br>41.8         | K.LSAFNFNDQTGOATLITNEDENFVKDEQR.A<br>R.ESYDNQGSPIVSLTHVNNYGGQDNR.N<br>R.TFTLSGANDWAHELTHGVTQETANLEYK.D                 |
| 3        | SspA      | Q5HH35                 | <b>Glutamyl endopeptidase</b> OS=Staphylococcus aureus (strain COL) OX=93062 GN=sspA PE=3 SV=1; <b>alternative names: Staphylococcal serine protease A, Endoproteinase Glu-C, V8 protease</b> | 36.3            | 4.9       | 482.4                          | 21.1         | 4                      | 55 - 64<br>65 - 76<br>133 - 155<br>246 - 271     | 1111.7092<br>1391.8103<br>2484.2935<br>2882.5601 | 33.1<br>43.2<br>198.6<br>207.5 | K.GGNLKPLEQR.E<br>R.EHANVILPNDR.H<br>K.AFPSAINQDNPNGGFTAEQITK.Y<br>K.NEVIGHWGGVPEFNGAVFINVR.N                          |
| 4        | SspA      | Q5HH35                 | <b>Glutamyl endopeptidase</b> OS=Staphylococcus aureus (strain COL) OX=93062 GN=sspA PE=3 SV=1; <b>alternative names: Staphylococcal serine protease A, Endoproteinase Glu-C, V8 protease</b> | 36.3            | 4.9       | 460.9                          | 17.6         | 4                      | 55 - 64<br>65 - 76<br>119 - 132<br>133 - 155     | 1111.6447<br>1391.7267<br>1496.7985<br>2484.2112 | 86<br>82.2<br>122.8<br>169.8   | K.GGNLKPLEQR.E<br>R.EHANVILPNDR.H<br>K.HVVDATHGDPHALK.A<br>K.AFPSAINQDNPNGGFTAEQITK.Y                                  |
| 5        | SspA      | Q5HH35                 | <b>Glutamyl endopeptidase</b> OS=Staphylococcus aureus (strain COL) OX=93062 GN=sspA PE=3 SV=1; <b>alternative names: Staphylococcal serine protease A, Endoproteinase Glu-C, V8 protease</b> | 36.3            | 4.9       | 347.7                          | 28.6         | 4                      | 65 - 76<br>77 - 111<br>133 - 155<br>246 - 271    | 1391.7535<br>3672.9709<br>2484.3547<br>2881.5850 | 63.7<br>96.1<br>127.3<br>60.5  | R.EHANVILPNDR.H<br>R.HQITDTTNGHYAPVTYIQVEAPTGTFIASGVVYVK.D<br>K.AFPSAINQDNPNGGFTAEQITK.Y<br>K.NEVIGHWGGVPEFNGAVFINVR.N |
| 6        | SspA      | Q5HH35                 | <b>Glutamyl endopeptidase</b> OS=Staphylococcus aureus (strain COL) OX=93062 GN=sspA PE=3 SV=1; <b>alternative names: Staphylococcal serine protease A, Endoproteinase Glu-C, V8 protease</b> | 36.3            | 4.9       | 376.2                          | 25.6         | 4                      | 119 - 132<br>133 - 155<br>223 - 245<br>246 - 271 | 1496.7922<br>2484.3079<br>2390.1846<br>2882.4939 | 50.3<br>130.2<br>129.4<br>66.2 | K.HVVDATHGDPHALK.A<br>K.AFPSAINQDNPNGGFTAEQITK.Y<br>K.GEAMQYDLSTTGGNSGSPVNEK.N<br>K.NEVIGHWGGVPEFNGAVFINVR.N           |

# MS/MS-sequence tags of tryptic peptides derived from the protein's propeptide were highlighted in blue (see also Figure S5).

**Figure S5.** Conversion of pro-SspA to mature, active SspA in HA

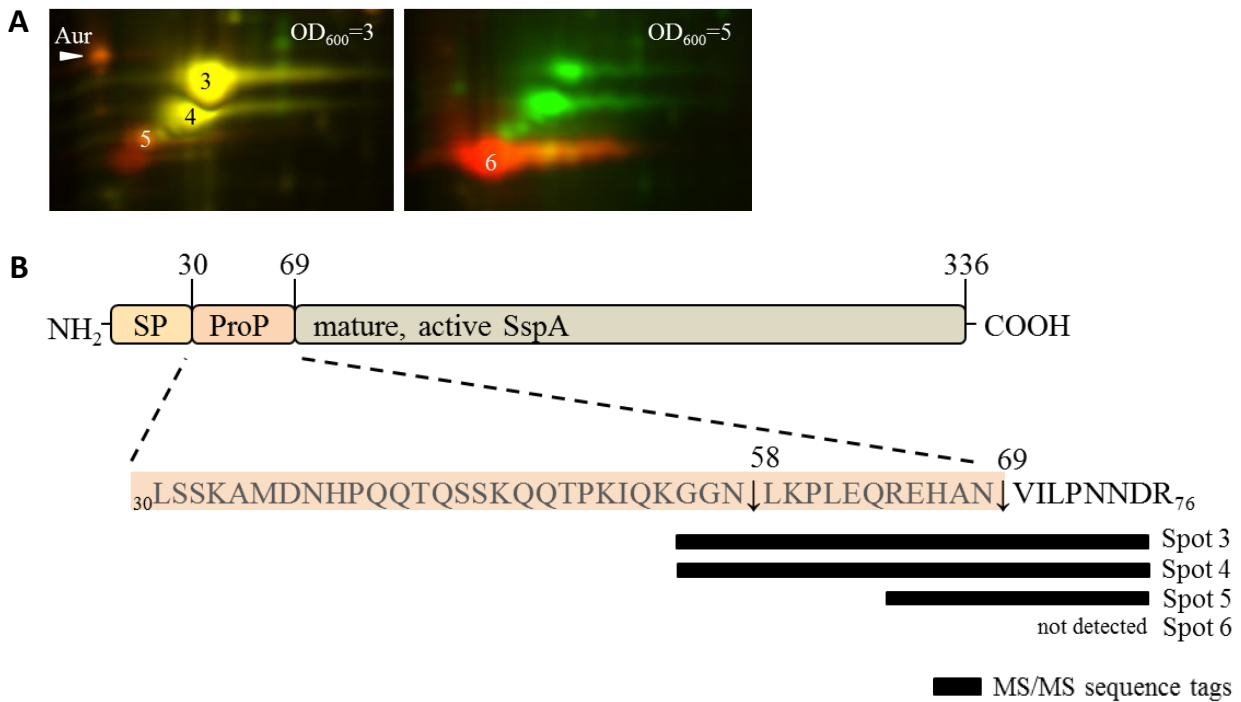

The trypsinogen-like mechanism of SspA activation was described by Nickerson *et al.* 2007, *J Biol Chem.*23;282(47):34129-38. Nickerson *et al.* 2007 demonstrated that after initial processing through autocatalytic intramolecular cleavage within a glutamine-rich SspA-propeptide segment, <sup>40</sup>QQTQSSKQQTPKIQ<sup>53</sup>, Aur subsequently processes at Leu<sup>58</sup> and then Val<sup>69</sup> to release mature, active SspA.

Indeed, for the SspA subform with the lowest molecular weight (Fig. S5A; spot 6) which was only abundant in the supernatant of HA (red channel), no peptide segments derived from the propeptide (pro-SspA) were detected by MALDI-TOF-MS/MS (Fig. S5B; see also Fig. S4). In contrast, all analysed higher molecular weight subforms of SspA (S5A; spots 3-5) contained peptide segments derived from the propeptide (Fig. S5B) which can be associated to SspA intermediates as a result of its step-wise activation being critically dependent on Aur at the final activation step. In line, Aur was only detected for the HA, but not in the IN isolates' supernatant at protein level which was supported by a very strong upregulation of *aur* at the transcriptional level in HA (Fig. 3C).

Thus, the differential abundance of SspA proteolytic cleavage products between the IN and HA isolates as well as specifically, detected MS/MS sequence tags derived from the propeptide of SspA support that pro-SspA is converted to mature, active SspA solely in the HA strain which further results in the subsequent activation of the zymogen SspB by removing its N-terminal propeptide as demonstrated by Massimi *et al.* 2002, *J. Biol. Chem.* 277, 41770–41777. Consequently, pro-SspB could not be detected in HA, but was present in the IN supernatant at OD<sub>600</sub> of 5.0 (Fig. 3b; Fig. S4).

**Figure S6. (A)** relative *hla* expression **(B)** Hla protein secretion **(C-D)** Haemolytic activity; after 18 hours at 37°C **(C)** and further storage at 4°C for 4 hours **(D)** plate layout **(E)**.

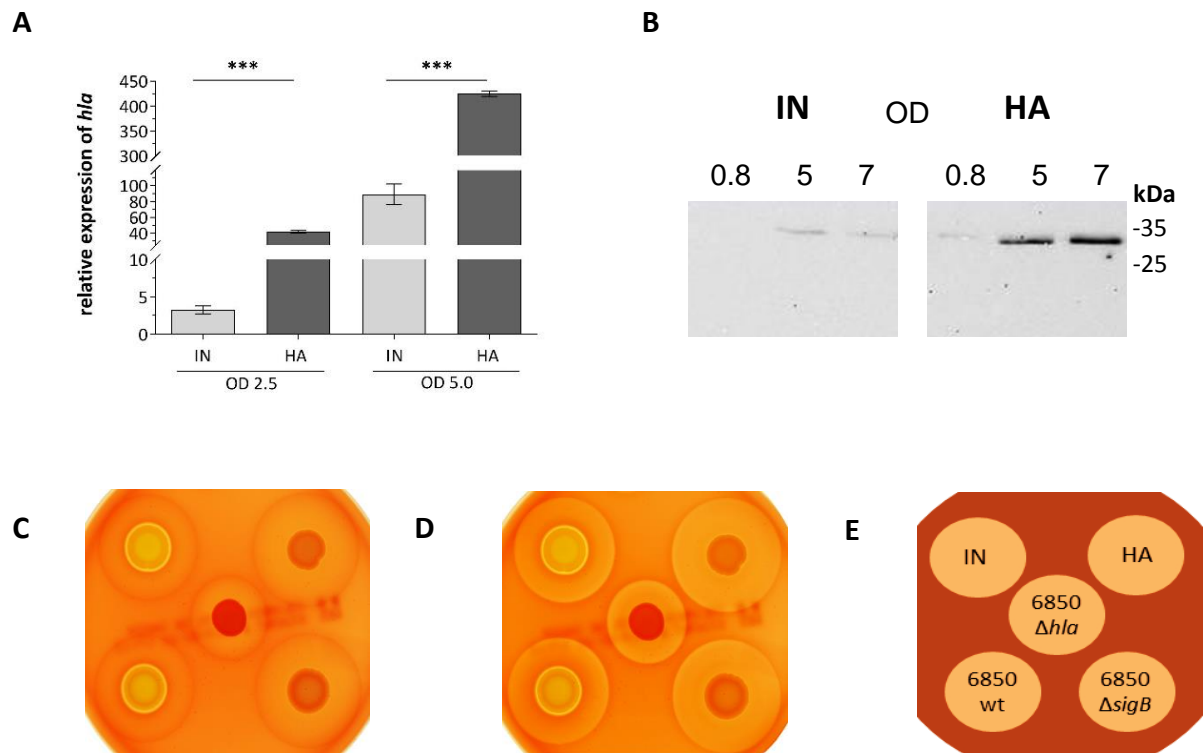

**(A)** *Hla* expression (qRT-PCR) was performed on strains grown in TSB to an optical density of 2.5 and 5.0. The data shown are the means of three independently grown strains and their technical duplicates. Statistical difference between the expression of the initial and host-adapted isolate was determined with unpaired Students *t* test on log10 transformed data. (\*\*\*,  $P < 0.001$ ).

**(B)** SDS-Page and western blot was performed with bacterial supernatant of three different bacterial densities ( $OD_{600} = 0.8, 5$  and  $7$ ) against the monoclonal anti-Hla-antibody.

**(C-E)** Haemolytic activity was assessed by spotting bacteria onto sheep blood and incubation. Zone of blood clearance was read by eye.

IN, initial isolate; HA, host-adapted isolate.

Figure S7. Original, full length zymogel/ 2D-DIGE gels for Figure 3A and 3B

3A

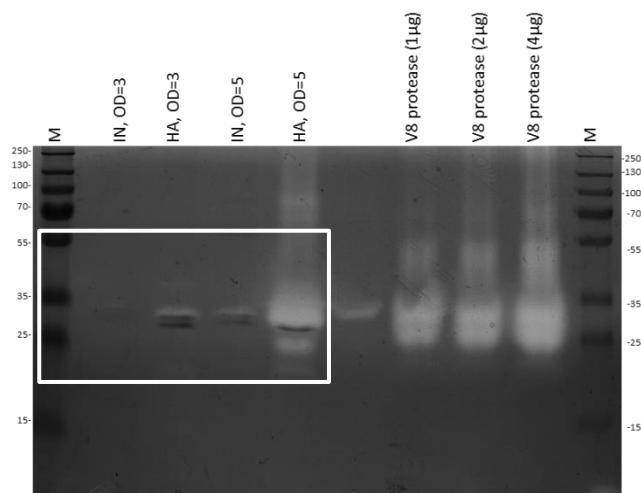

3B

$OD_{600}=0.8$

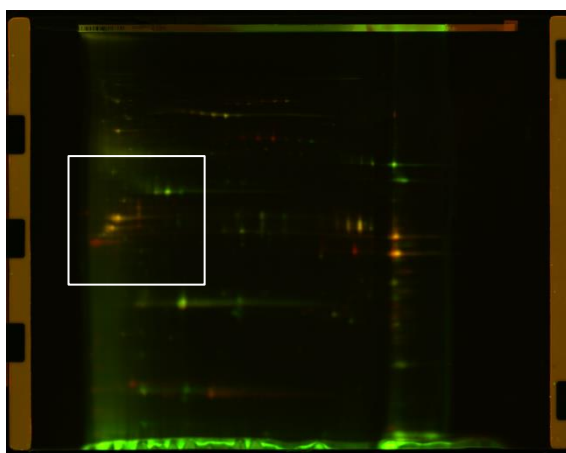

$OD_{600}=3.0$

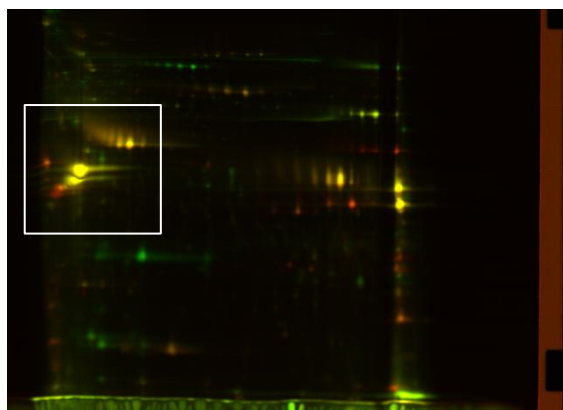

$OD_{600}=5.0$

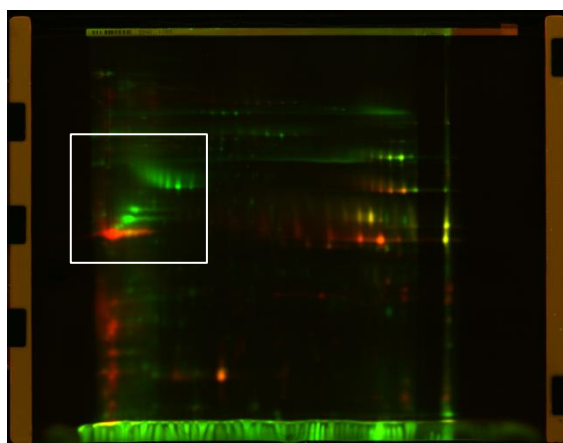



**Table S1.** Mutations (SNPs) detected by comparative sequence analysis of the initial isolate (V1) and its isogenic isolates.

| Variant | Locus tag (N315) | Locus tag (COL) | Gene  | Product                                                        | Effect         | Function                                                               |
|---------|------------------|-----------------|-------|----------------------------------------------------------------|----------------|------------------------------------------------------------------------|
| V2      | SA1026           | SACOL1196       | murD  | UDP-N-acetyl/muramoyl-L-alanyl-D-glutamate synthetase          | non-synonymous | Biosynthesis and degradation of murein sacculus and peptidoglycan      |
| V3      | SA1891           | SACOL2079       | ds2   | Cardiolipin synthetase                                         | non-synonymous | Glycerolipid and Glycerophospholipid Metabolism                        |
| V4      | SA0793           | SACOL0935       | dlta  | D-alanine-poly(phosphoribitol) ligase subunit 1                | non-synonymous | Biosynthesis and degradation of murein sacculus and peptidoglycan      |
|         | SA0834           | SACOL0978       | ?     | Hypothetical protein                                           | non-synonymous | Unknown                                                                |
|         | SA2129           | SACOL2332       | galM  | Aldose 1-epimerase                                             | non-synonymous | Lactose and Galactose Uptake and Utilization                           |
|         | SA0315           | SACOL0397       | sirTM | Hypothetical protein                                           | synonymous     | Unknown                                                                |
| V5      | SA1088           | SACOL1262       | sucC  | Succinyl-CoA synthetase subunit beta                           | non-synonymous | TCA cycle; catalyzes the interconversion of succinyl-CoA and succinate |
|         | SA0981           | SACOL1144       | isdF  | Hypothetical protein                                           | synonymous     | Putative ABC transporter                                               |
| V6      | SA2147           | SACOL2353       | tcaR  | Transcriptional regulator TcaR                                 | non-synonymous | Quorum sensing and biofilm formation                                   |
|         | SA1675           | SACOL1916       | ?     | Amino acid ABC transporter permease/substrate-binding protease | non-synonymous | Putative ABC transporter                                               |
| V7      | SA2135           | SACOL2340       | gltS  | Sodium/glutamate symporter                                     | non-synonymous | Sodium/glutamate symporter                                             |
|         | SA1990           | SACOL2179       | ?     | Hypothetical protein                                           | synonymous     | Unknown                                                                |
|         | SA2084           | SACOL2282       | ureC  | Urease subunit alpha                                           | synonymous     | Urea decomposition                                                     |
| V8      | SA1872           | SACOL2057       | rsbu  | Serine phosphatase RsbU, regulator of sigma subunit            | non-synonymous | SigmaB stress response regulation                                      |
|         | SA0212           | SACOL0198       | ?     | Hypothetical protein                                           | non-synonymous | Unknown                                                                |
|         | SA0192           | N.N.            | ?     | Hypothetical protein                                           | non-synonymous | Putative export ABC transporter                                        |
| V9      | SA1872           | SACOL2057       | rsbu  | Serine phosphatase RsbU, regulator of sigma subunit            | non-synonymous | SigmaB stress response regulation                                      |
|         | SA0212           | SACOL0198       | ?     | Hypothetical protein                                           | non-synonymous | Unknown                                                                |
|         | SA0192           | N.N.            | ?     | Hypothetical protein                                           | non-synonymous | Putative export ABC transporter                                        |
|         | SA1828           | N.N.            | ?     | Hypothetical protein                                           | non-synonymous | Putative DNA helicase                                                  |

Whole genome sequencing was performed by shotgun sequencing using the *Illumina Miseq* platform PE300. SNP differences of 20 isolates compared to the IN isolate (V1), allowing for gene variant assignment based on the strains SNP difference. Locus tags referred to the *Staphylococcus aureus* strains N315 and COL.

**Table S2.** qRT-PCR primer and their efficiencies.

| Target gene  | Forward primer (5' – 3')  | Reverse primer (5' – 3') | Primer efficiency | Reference                                                                   |
|--------------|---------------------------|--------------------------|-------------------|-----------------------------------------------------------------------------|
| <i>dnaN</i>  | ACGTGATTGCACAAACAAATTTTGC | AAGCCAGTTCACACCAGTTAGTAC | 2.38              | Pförtner <i>et al.</i> , 2014, <i>Int. J. Med. Microbiol.</i> 304, 177–187. |
| <i>rho</i>   | CAGGACGCTCGCCAACTAAC      | CCGCATTCCAAGCTTTGACAC    | 2.00              | current study                                                               |
| <i>rpoD</i>  | TCAAGGAATAACATACCACGAC    | TGACGAGAAACTGAATCCAAG    | 1.91              | current study                                                               |
| <i>hla</i>   | GCAAATGTTTCGATTGGTCA      | CCATATACCGGGTTCCAAGA     | 2.05              | Burnside <i>et al.</i> , 2010, <i>PLoS One</i> 5:e11071                     |
| <i>asp23</i> | AAAGCAAAACAAGCATACGACAATC | AGCGATACCAGCAATTTTTTCAAC | 1.99              | Tuscherr <i>et al.</i> , 2015, <i>PLoS Pathog.</i> 11, e1004870.            |
| <i>aur</i>   | ACCGTGTGTTAATTCGTGTGCTA   | ATGGTCGCACATTCACAAGTTT   | 2.07              | Tuscherr <i>et al.</i> , 2015, <i>PLoS Pathog.</i> 11, e1004870.            |
